# Supplementary material for: Click synthesis of ionic strength-responsive polyphosphazene hydrogel for reversible binding of enzymes
Source: Royal Society of Chemistry journal article supplement (doi:10.1039/c5ra06649b), 2015-01-01
Supplement: c5ra06649b1.pdf [file c5ra06649b1.pdf]

## Supporting Information

### Click Synthesis of Ionic Strength-Responsive Polyphosphazene

#### Hydrogel for Reversible Binding of Enzymes

Yue-Cheng Qian, Peng-Cheng Chen, Xue-Yan Zhu and Xiao-Jun Huang\*

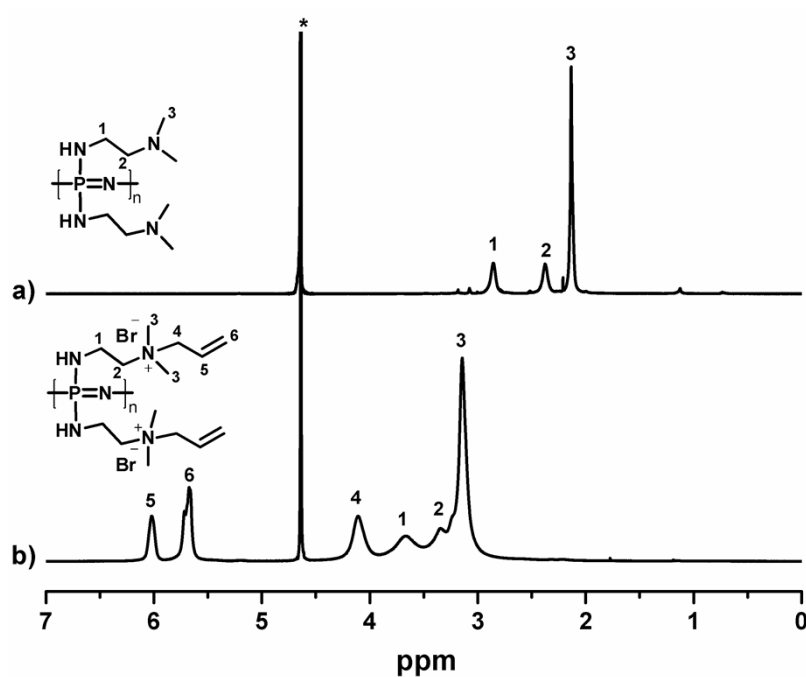

**Figure S1**  $^1\text{H}$  NMR spectra of (a) polyphosphazene with pendant tertiary amino groups, and (b) polyphosphazene with pendant allyl groups.

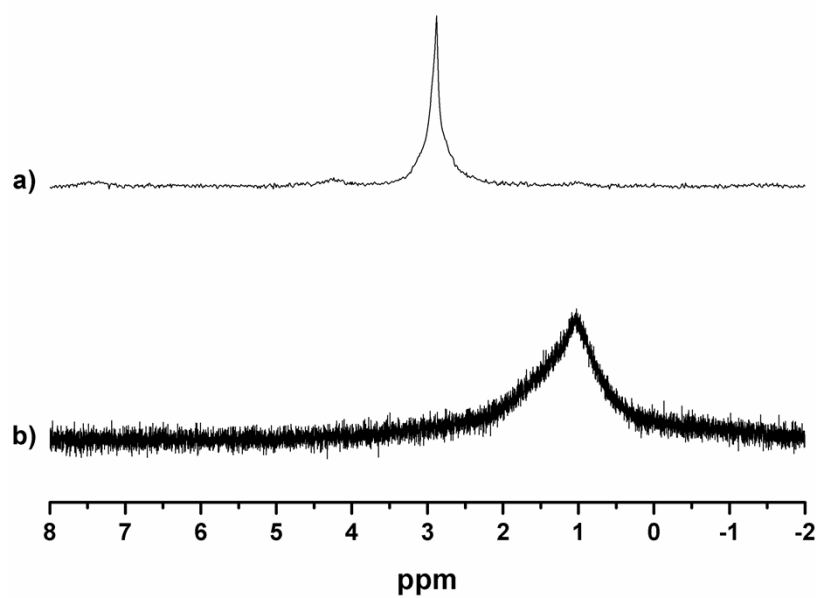

**Figure S2**  $^{31}\text{P}$  NMR spectra of (a) polyphosphazene with pendant tertiary amino groups, and (b) polyphosphazene with pendant allyl groups.

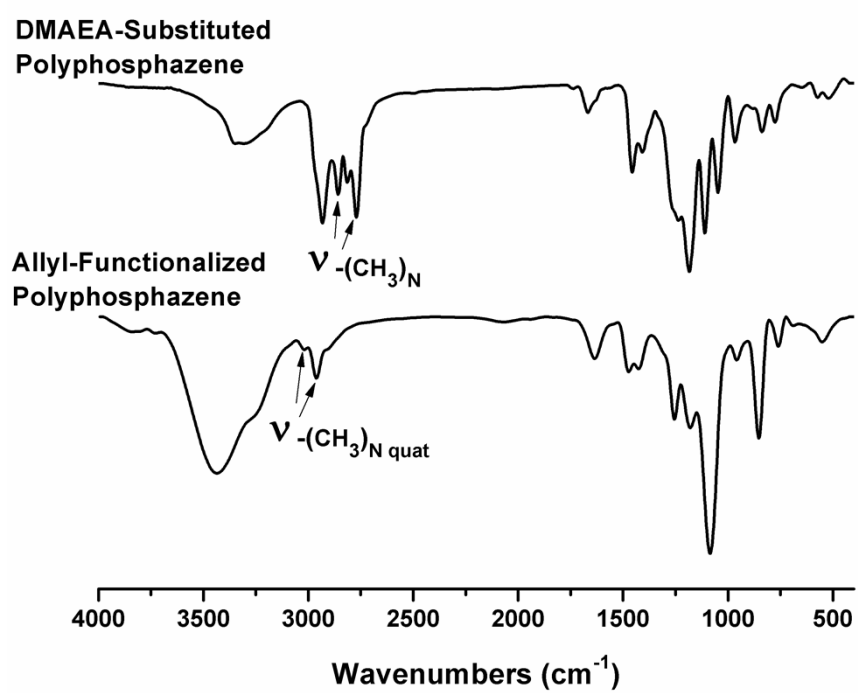

Figure S3 FTIR spectra of polyphosphazene before and after the quaternization.

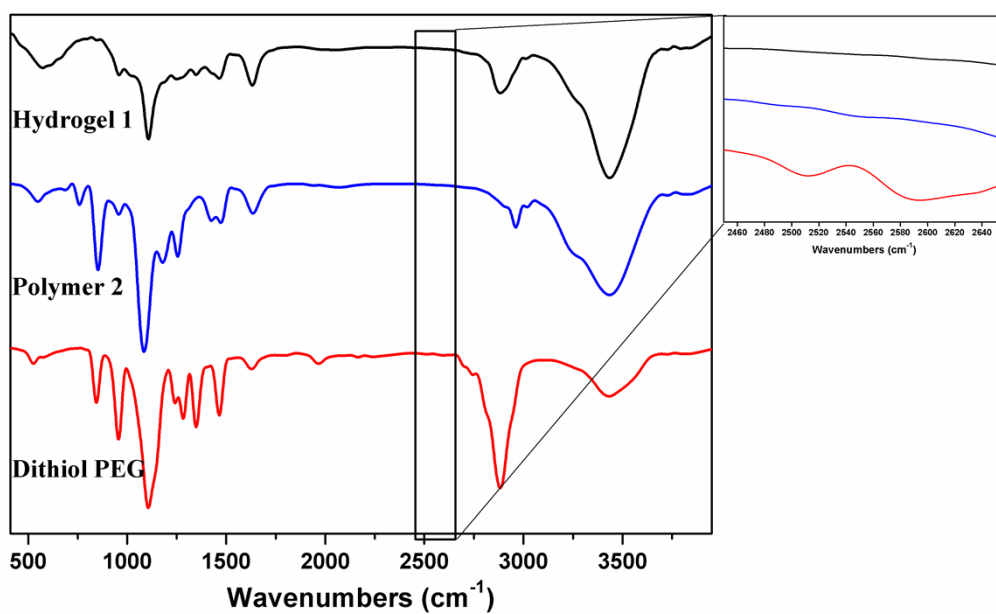

**Figure S4** FTIR spectra of Hydrogel 1, polyphosphazene with pendant tertiary amino groups (Polymer 2), and poly(ethylene glycol) dithiol (Dithiol PEG).

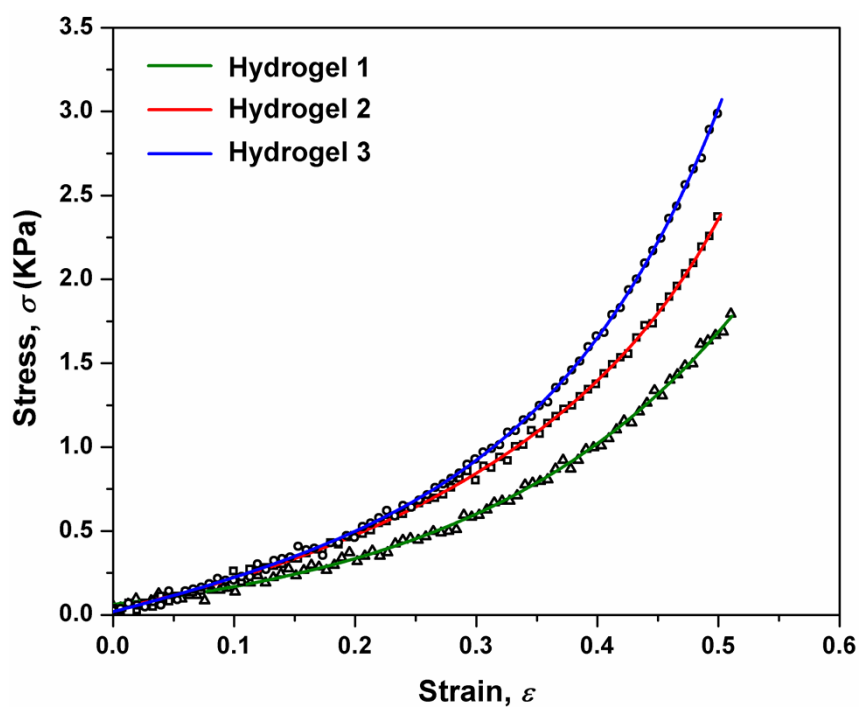

**Figure S5** Stress–strain plots of the hydrogels under compression.

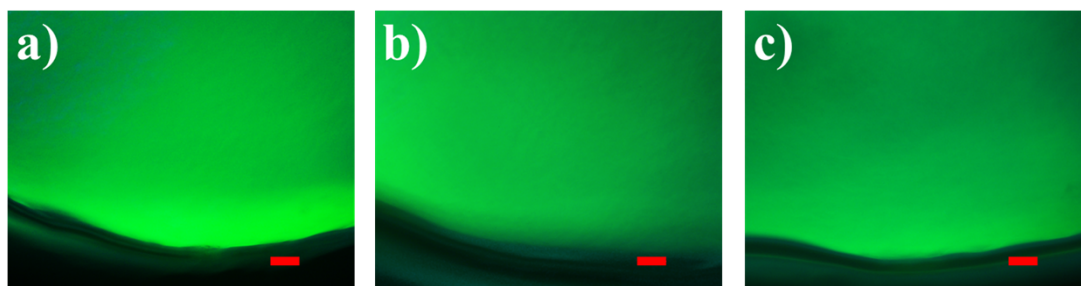

**Figure S6** Fluorescence images of the hydrogels after incubation with FITC-labeled BSA, (a) Hydrogel 1, (b) Hydrogel 2, and (c) Hydrogel 3. The scale bars represent 100  $\mu\text{m}$ .
